# Supplementary material
Source: PubMed Central journal article supplement (PMC7577522)
Supplement: NIHMS1560786-supplement-315760_Major_Resources_Table.pdf [file NIHMS1560786-supplement-315760_Major_Resources_Table.pdf]

### Major Resources Table

In order to allow validation and replication of experiments, all essential research materials listed in the Methods should be included in the Major Resources Table below. Authors are encouraged to use public repositories for protocols, data, code, and other materials and provide persistent identifiers and/or links to repositories when available. Authors may add or delete rows as needed.

#### Animals (in vivo studies)

##### Genetically Modified Animals

|                              | Species | Vendor or Source                   | Background Strain | Other Information   | Persistent ID / URL |
|------------------------------|---------|------------------------------------|-------------------|---------------------|---------------------|
| <b>Parent – Male Spy-C</b>   | Mouse   | University of Arizona<br>GEMM Core | BL6/NJ            | CRISPR/Cas 9 Edited |                     |
| <b>Parent – Female Spy-C</b> | Mouse   | University of Arizona<br>GEMM Core | BL6/NJ            | CRISPR/Cas 9 Edited |                     |

##### Antibodies

| Target antigen                    | Vendor or Source                                       | Catalog #                        | Working concentration | Lot # (preferred but not required)                 | Persistent ID / URL |
|-----------------------------------|--------------------------------------------------------|----------------------------------|-----------------------|----------------------------------------------------|---------------------|
| Actin                             | Sigma-Aldrich (St. Louis, MO, USA)                     | A9357                            | 1:5,000               |                                                    |                     |
| a-actinin                         | Sigma-Aldrich (St. Louis, MO, USA)                     | A7811                            | 1:5,000               |                                                    |                     |
| cMyBP-C                           | Custom antibody (University of Wisconsin, Madison, WI) | Harris Lab                       | 1:75,000              | Reference: Harris et al, Circ Res 2002;90:594–601. |                     |
| Anti-Rabbit (2 <sup>0</sup> )     | Li-Cor (Lincoln, Nebraska, USA)                        | 800CW                            | 1:10,000              |                                                    |                     |
| Goat Anti-Mouse (2 <sup>0</sup> ) | Li-Cor (Lincoln, Nebraska, USA)                        | 680CW                            | 1:10,000              |                                                    |                     |
| a-actinin AlexaFluor568           | Life Technologies (Thermo-Fisher)                      | A11004                           | 1:10,000              |                                                    |                     |
| SpyTag                            | Genscript (Piscataway, NJ)                             | Custom antibody order/Harris Lab | 1:10,000              |                                                    |                     |
|                                   |                                                        |                                  |                       |                                                    |                     |

**DNA/cDNA Clones**

| <b>Clone Name</b>                                                              | <b>Sequence</b>                                                                                                  | <b>Source</b>              | <b>Persistent ID / URL</b> |
|--------------------------------------------------------------------------------|------------------------------------------------------------------------------------------------------------------|----------------------------|----------------------------|
| <i>rC0C7sc</i> (and related plasmids subcloned or modified from this template) | NP_032679.2 (mouse cMyBP-C cDNA sequence) *Sequence was codon optimized by Genscript for expression in bacteria. | GenScript (Piscataway, NJ) |                            |
| TEV protease, S219V mutant                                                     | pRK793                                                                                                           | Addgene #8827              |                            |
|                                                                                |                                                                                                                  |                            |                            |

**Data & Code Availability**

| <b>Description</b>                                                                                                | <b>Source / Repository</b> | <b>Persistent ID / URL</b> |
|-------------------------------------------------------------------------------------------------------------------|----------------------------|----------------------------|
| Data that support the findings of this study are available from the corresponding author upon reasonable request. | Harris Lab                 |                            |
|                                                                                                                   |                            |                            |
|                                                                                                                   |                            |                            |
