# Supplementary material
Source: PubMed Central journal article supplement (PMC7577522)

Fig 2A

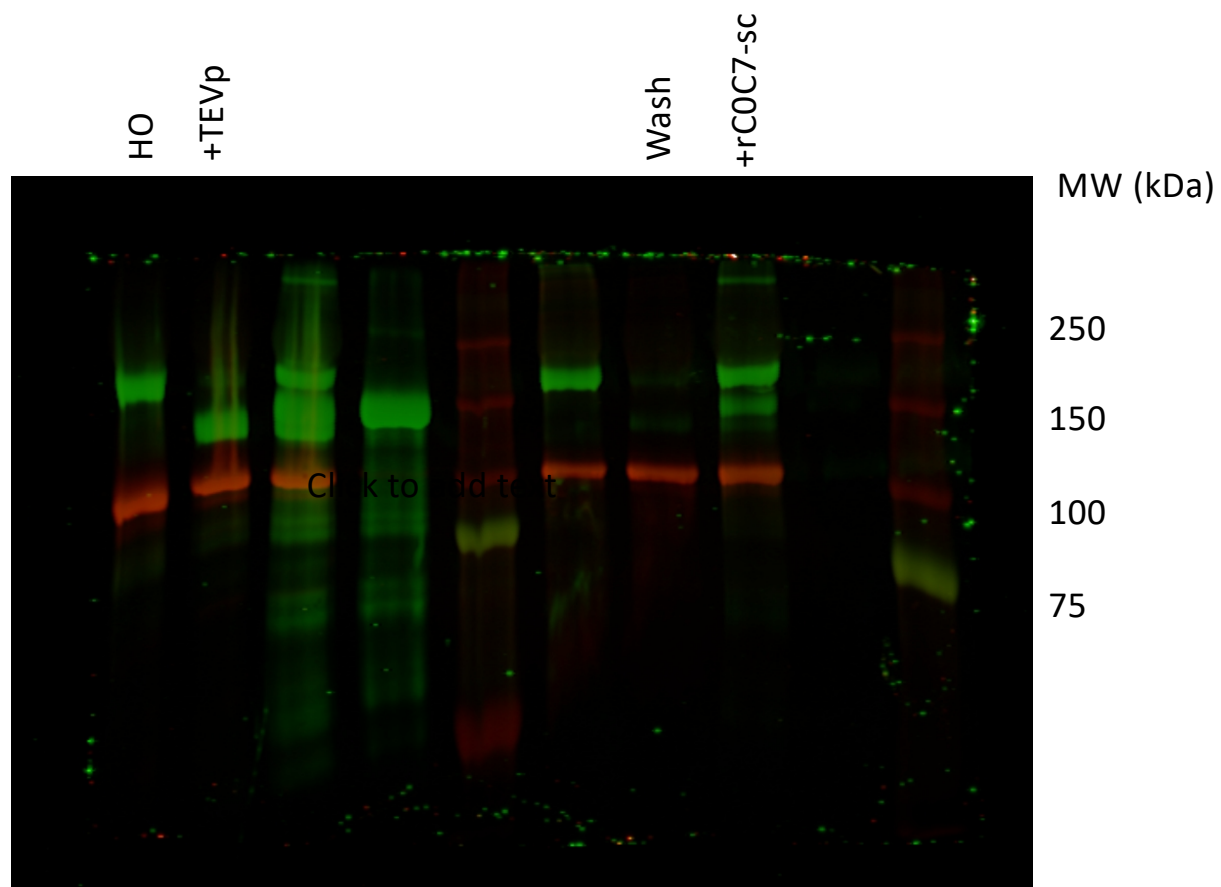

Fig 2B

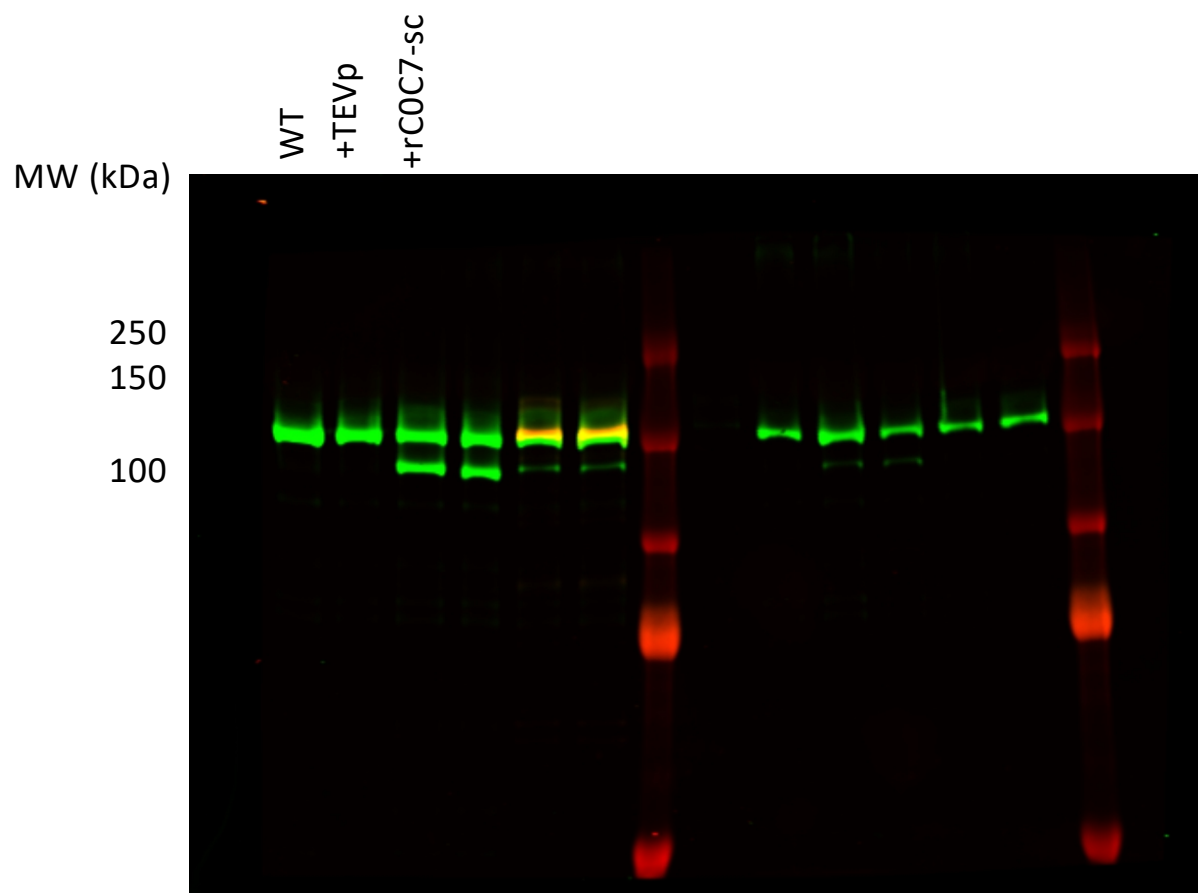

Fig 2C (top)

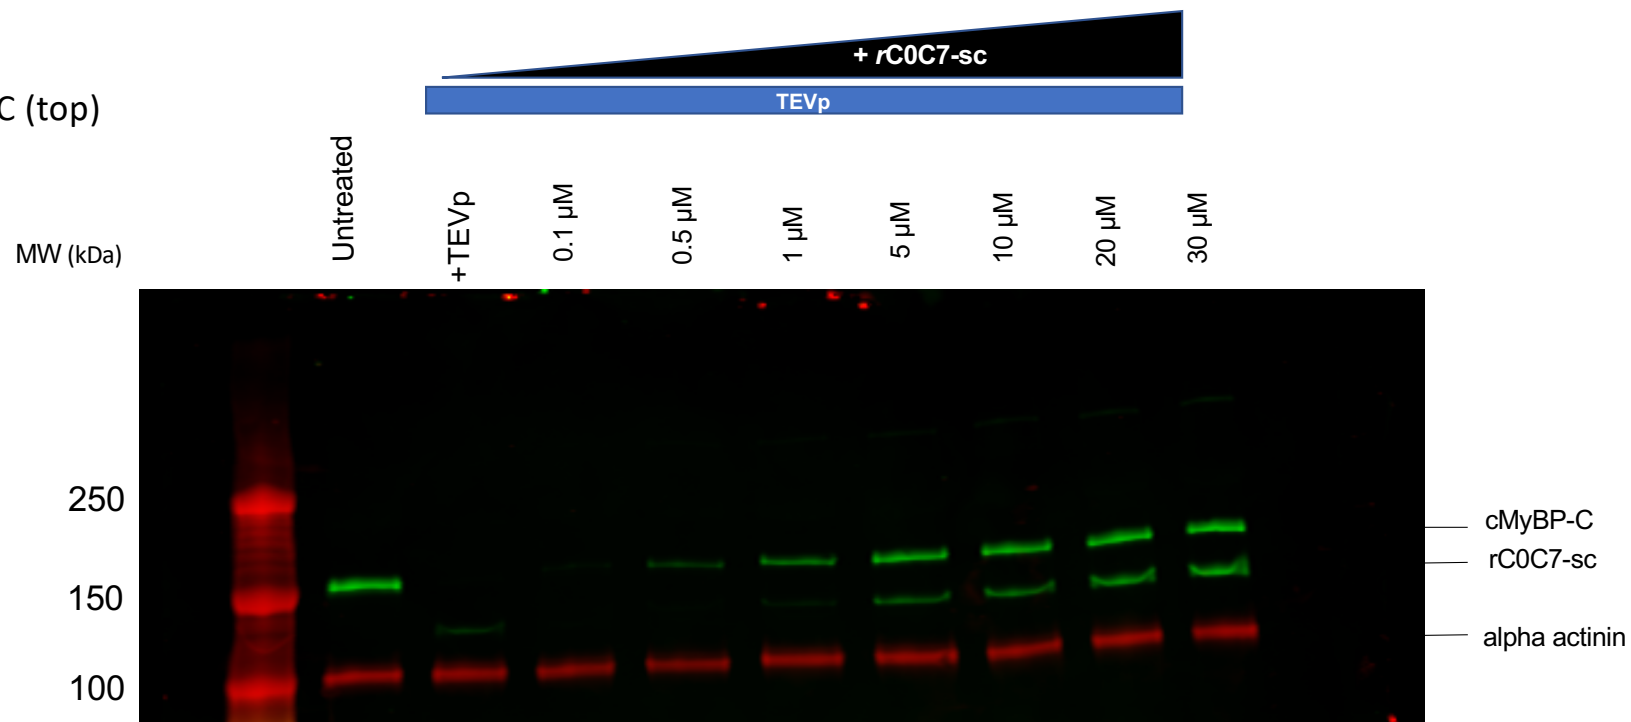

Fig 2C (middle and bottom panels)

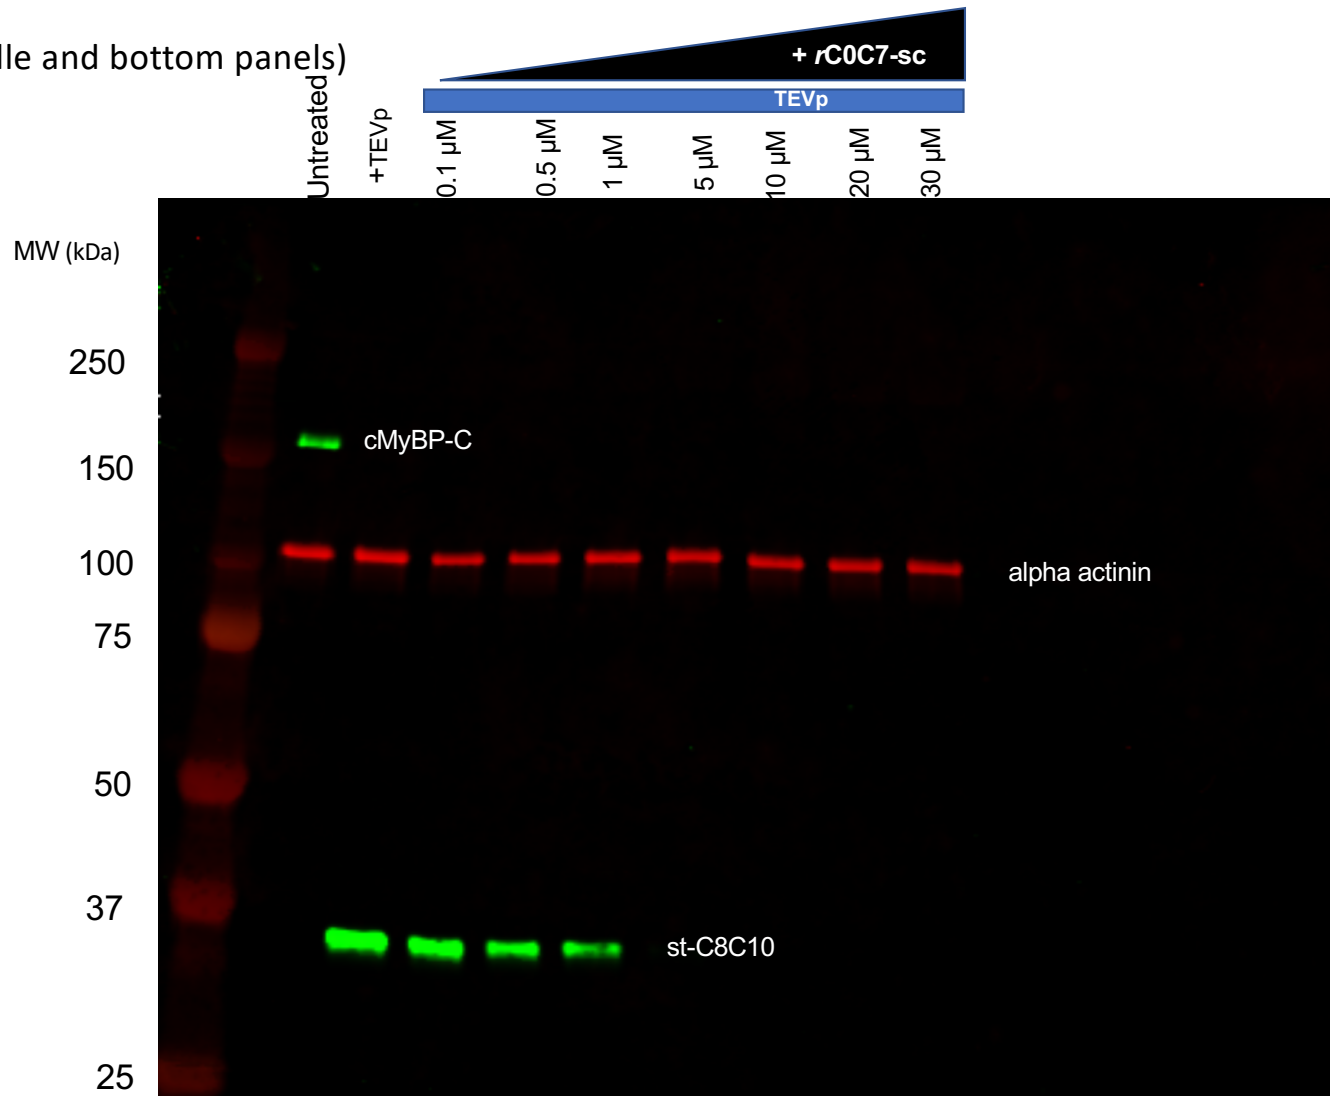

Fig 2F

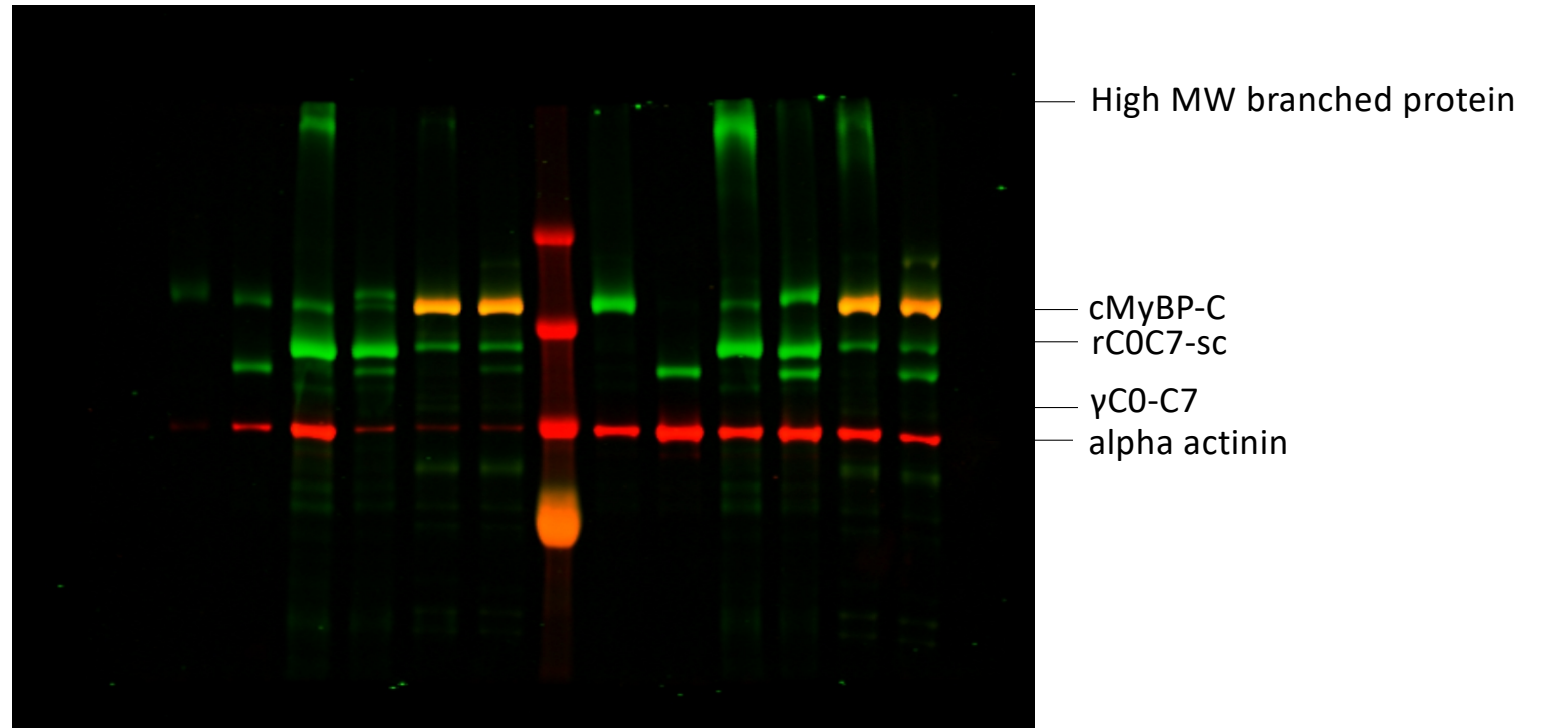

|          |   |   |   |
|----------|---|---|---|
| TEVp     | - | + | - |
| rCOC7-sc | - | - | + |

Fig SV D

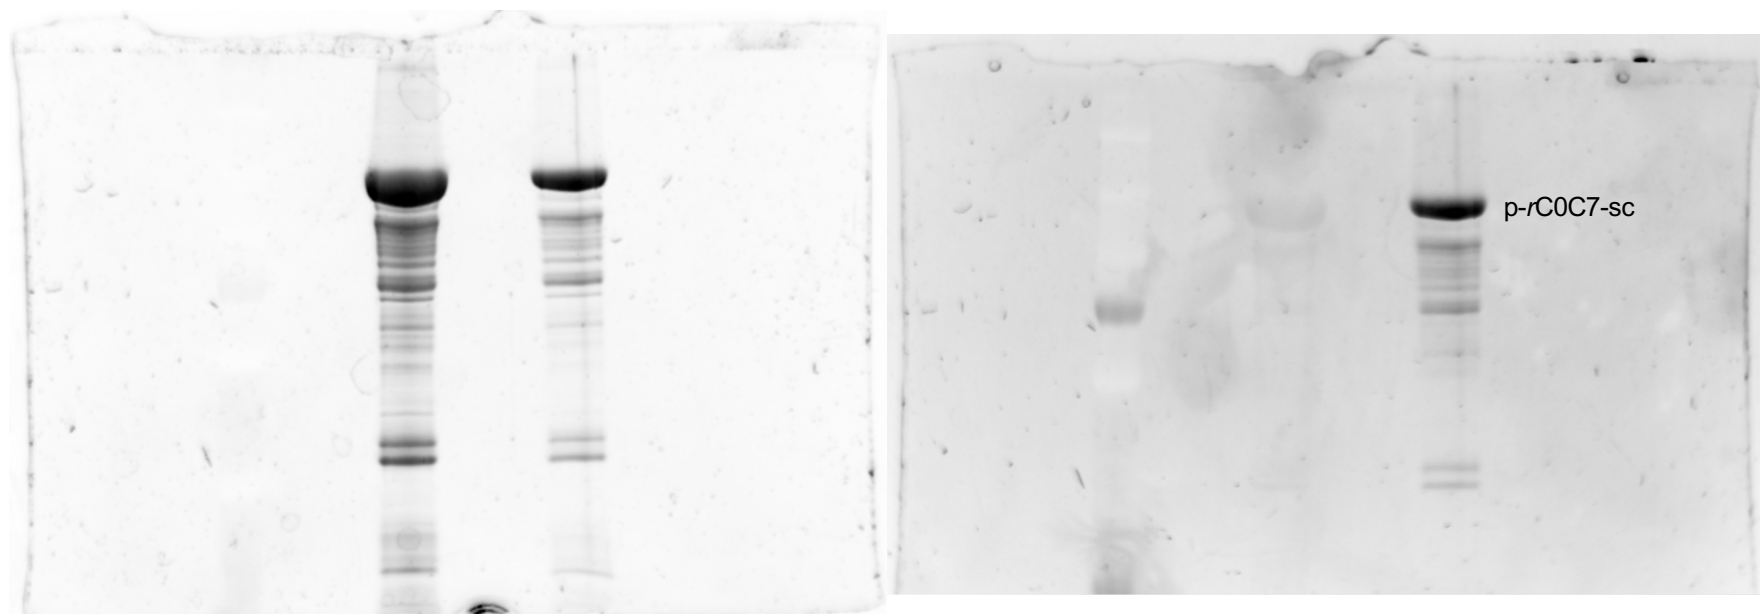

Fig SV A and B

**A**

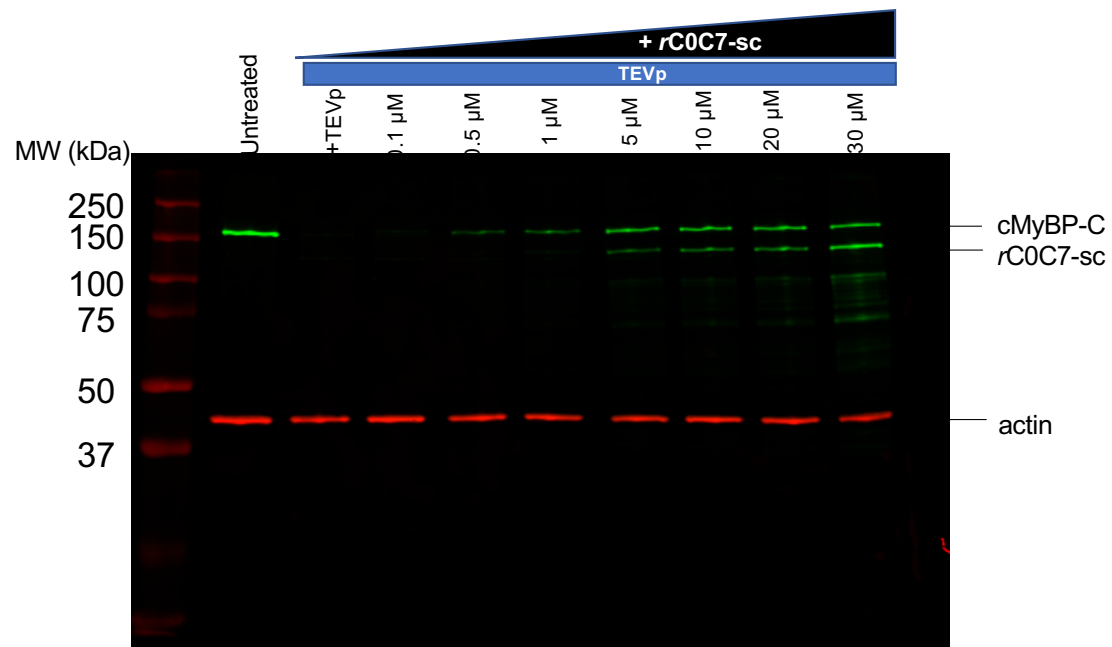

**B**

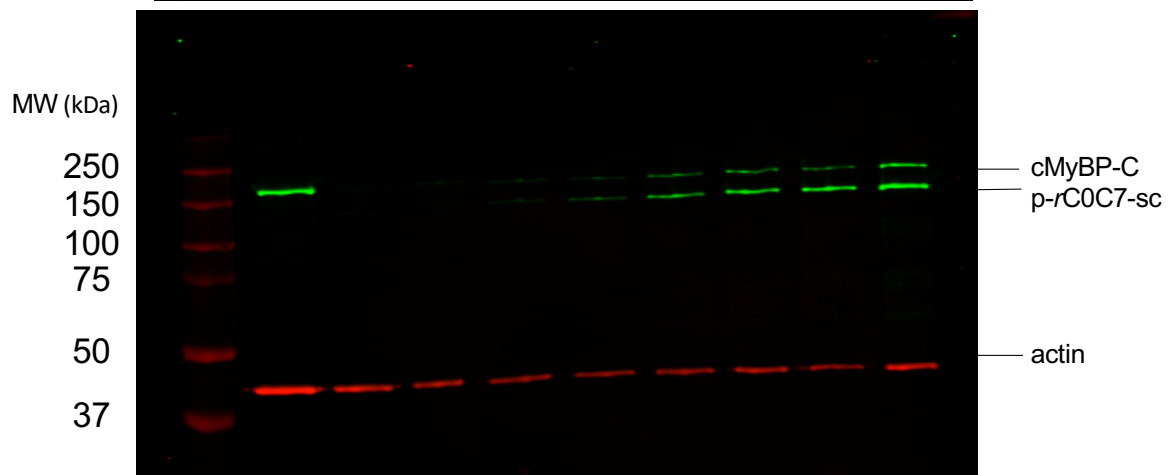

Fig SVII A

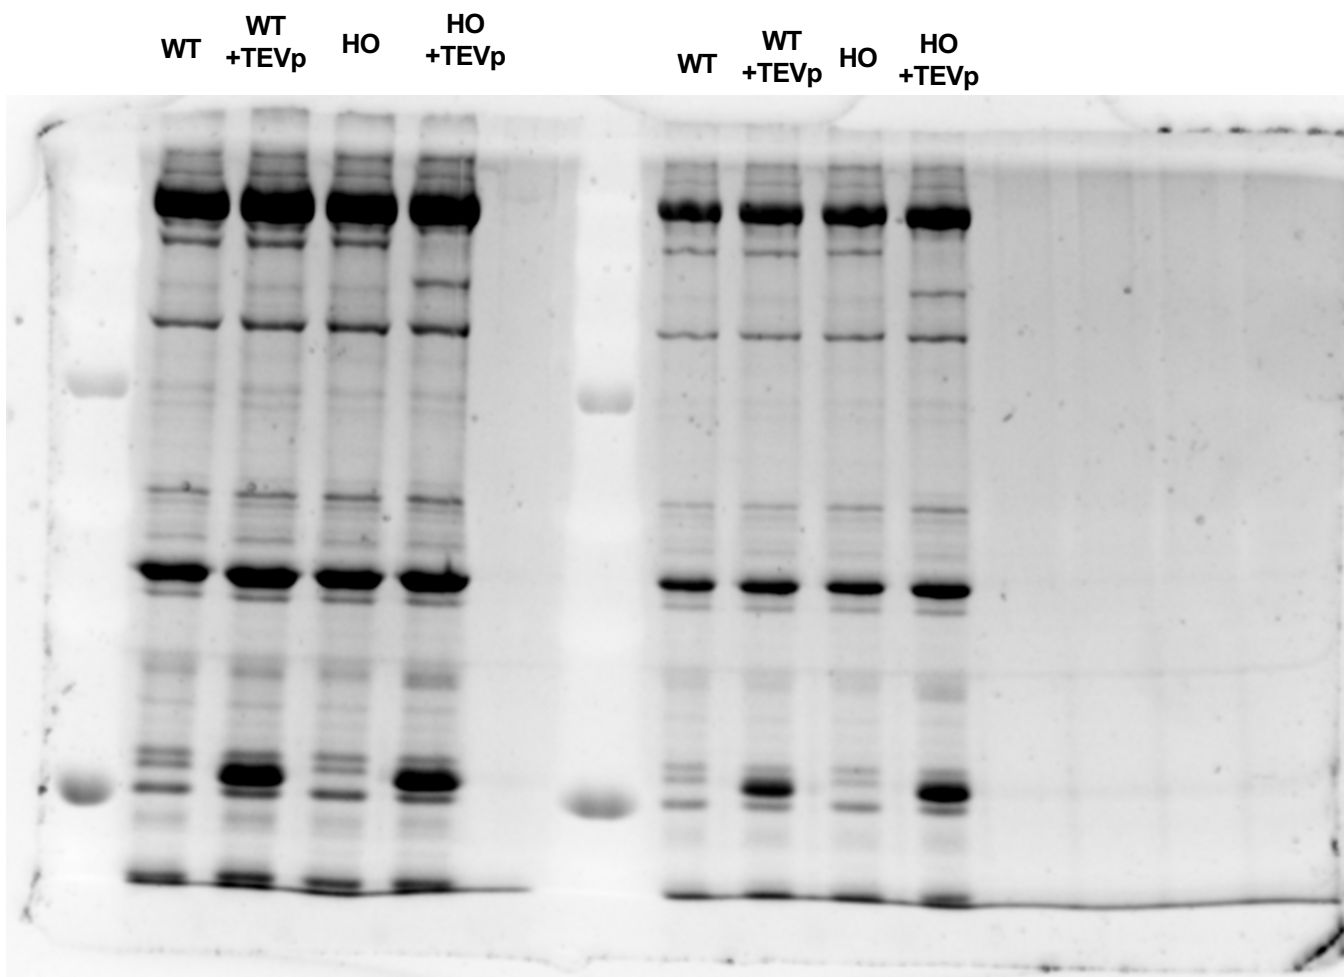

Supplement: NIHMS1560786-supplement-315760_Uncut_Gel_Blots.pdf [file NIHMS1560786-supplement-315760_Uncut_Gel_Blots.pdf]
